# Supplementary material for: Aberrant TET1 Methylation Closely Associated with CpG Island Methylator Phenotype in Colorectal Cancer
Source: Oxford University Press journal article supplement (doi:10.1158/1940-6207.capr-14-0306), 2015-06-10
Supplement: 19406207capr140306-sup-137907_1_supp_2784037_ngg0z1.docx [file 19406207capr140306-sup-137907_1_supp_2784037_ngg0z1.docx]

**Supplementary Table 3. Relationship between TET1 methylation and other mutation and methylation markers in CIMP-P CRCs (in our cohort).**

| **Characteristic** | **Total** | **TET1**  **methylated** | **TET1 unmethylated** | ***P*-value** |
| --- | --- | --- | --- | --- |
| **n=55** | **n=23** | **n=32** |
| **BRAF** |  |  |  |  |
| **Mutated** | 23 (42) | 15 (65) | 8 (35) | 0.005 |
| **Wild type** | 32 (58) | 8 (25) | 24 (75) |  |
| **KRAS** |  |  |  |  |
| **Mutated** | 14 (25) | 4 (29) | 10 (71) | 0.350 |
| **Wild type** | 41 (75) | 19 (46) | 22 (54) |  |
| **MINT1** |  |  |  |  |
| **Methylated** | 43 (78) | 22 (51) | 21 (49) | 0.009 |
| **Unmethylated** | 12 (22) | 1 (8) | 11 (92) |  |
| **MINT2** |  |  |  |  |
| **Methylated** | 40 (73) | 21 (52.5) | 19 (47.5) | 0.013 |
| **Unmethylated** | 15 (27) | 2 (13) | 13 (87) |  |
| **MINT31** |  |  |  |  |
| **Methylated** | 48 (87) | 19 (40) | 29 (60) | 0.435 |
| **Unmethylated** | 7 (13) | 4 (57) | 3 (43) |  |
| **P16** |  |  |  |  |
| **Methylated** | 39 (71) | 21 (54) | 18 (46) | 0.006 |
| **Unmethylated** | 16 (29) | 2 (12.5) | 14 (87.5) |  |
| **hMLH1** |  |  |  |  |
| **Methylated** | 20 (36) | 11 (55) | 9 (45) | 0.163 |
| **Unmethylated** | 35 (64) | 12 (34) | 23 (66) |  |
