# Supplementary material for: Aberrant TET1 Methylation Closely Associated with CpG Island Methylator Phenotype in Colorectal Cancer
Source: Oxford University Press journal article supplement (doi:10.1158/1940-6207.capr-14-0306), 2015-06-10
Supplement: 19406207capr140306-sup-137907_1_supp_2784038_ng60z1.docx [file 19406207capr140306-sup-137907_1_supp_2784038_ng60z1.docx]

**Supplementary Table 4. Relationship between TET1 methylation and Clinical features in CIMP-P CRCs (TCGA data set).**

| **Characteristic** | **Total** | **TET1 methylated** | **TET1 unmethylated** | ***P*-value** |
| --- | --- | --- | --- | --- |
| **n=201** | **n=67** | **n=134** |
| **T** |  |  |  |  |
| **T1/2** | 38 | 9 (24) | 29 (76) | 0.185 |
| **T3/4** | 163 | 58 (36) | 105 (64) |  |
| **N** |  |  |  |  |
| **N0** | 131 | 47 (36) | 84 (64) | 0.347 |
| **N1/2** | 70 | 20 (29) | 50 (71) |  |
| **M** |  |  |  |  |
| **M0** | 175 | 63 (36) | 112 (64) | 0.045 |
| **M1** | 26 | 4 (15) | 22 (85) |  |
| **Stage** |  |  |  |  |
| **Ⅰ/Ⅱ** | 130 | 48 (37) | 82 (63) | 0.161 |
| **Ⅲ/Ⅳ** | 71 | 19 (27) | 52 (73) |  |
